# Supplementary material for: Influence of high-pressure treatment on charge carrier transport in PbS colloidal quantum dot solids
Source: Royal Society of Chemistry journal article supplement (doi:10.1039/c3nr03641c), 2013-11-01
Supplement: c3nr03641c.pdf [file c3nr03641c.pdf]

*Electronic Supplementary Information*

**Influence of high-pressure treatment on charge carrier transport in PbS  
colloidal quantum dot solids**

Seung Jin Heo, Seokhyun Yoon, Sang Hoon Oh, Do Hyun Yoon, and Hyun Jae Kim\*

School of Electrical and Electronic Engineering, Yonsei University, Seoul 120-749, Republic  
of Korea

E-mail: [hjk3@yonsei.ac.kr](mailto:hjk3@yonsei.ac.kr)

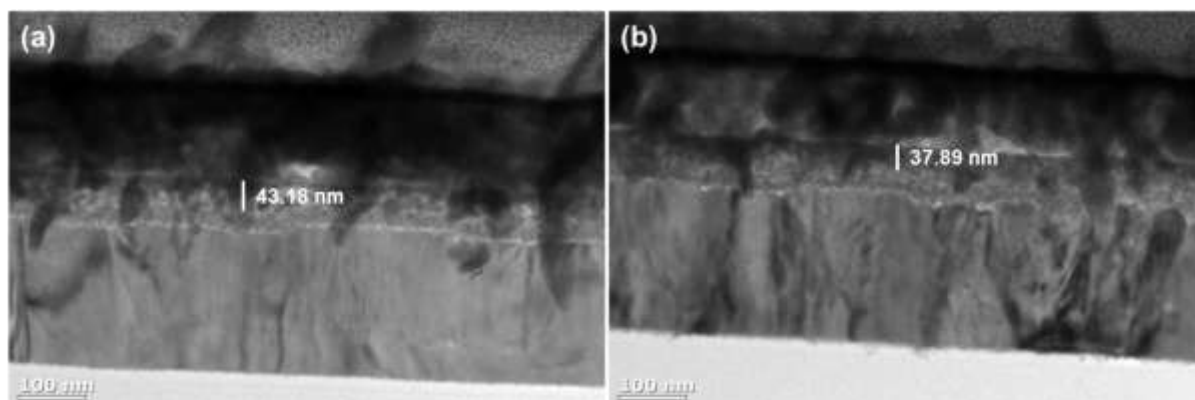

**Fig. S1** Cross-sectional HR-TEM images of the Ag/MoO<sub>3</sub>/PbS CQD solids/ZnO stack on an ITO substrate. The thicknesses of the (a) as-prepared and (b) high-pressure-treated PbS CQD solids are shown.

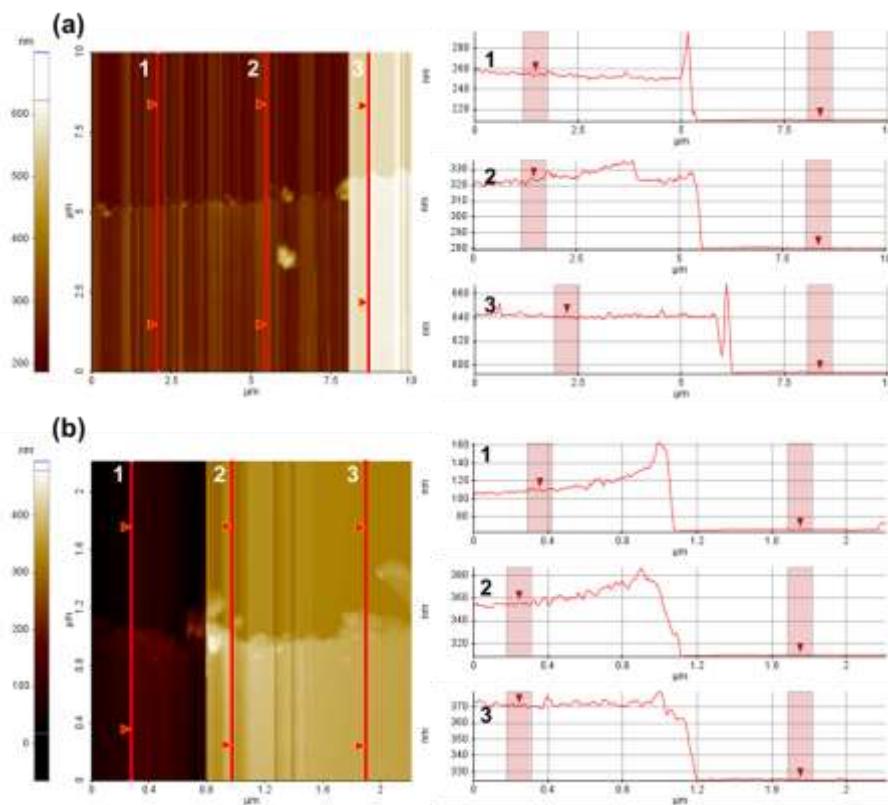

**Fig. S2** Line profile of as-prepared PbS CQD solids scanned along red lines indicated in the AFM images at the left. Red arrow represents average cursor pair. (a) The scan size is 10  $\mu\text{m}$  x 10  $\mu\text{m}$ . (b) The size is 2.2  $\mu\text{m}$  x 2.2  $\mu\text{m}$ .

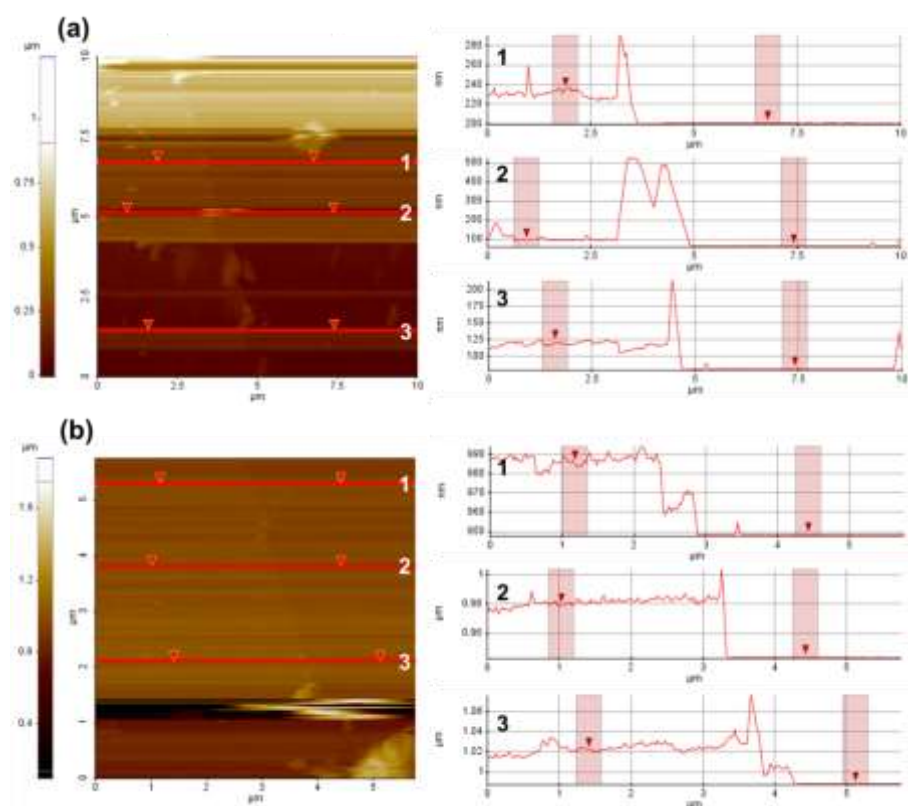

**Fig. S3** Line profile of high-pressure-treated PbS CQD solids scanned along red lines indicated in the AFM images at the left. Red arrow represents average cursor pair. (a) The scan size is 10 μm x 10 μm. (b) The size is 5.7 μm x 5.7 μm.

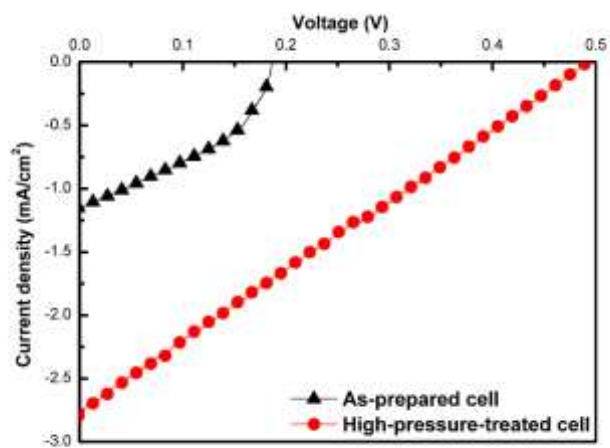

**Fig. S4** *J-V* curves of as-prepared and the high-pressure-treated cell.

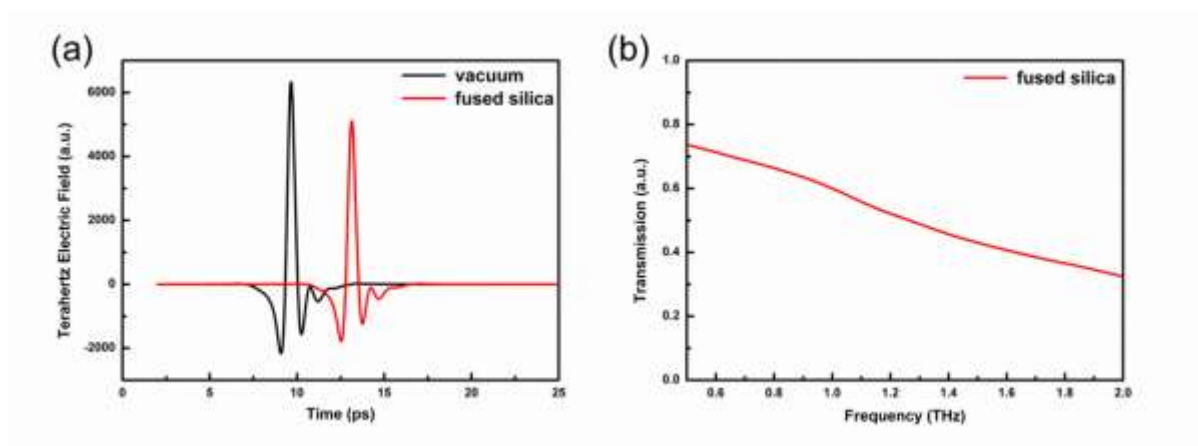

**Fig. S5** (a) The THz electric field transmitted through vacuum and fused silica. (b) The transmission spectra of fused silica.

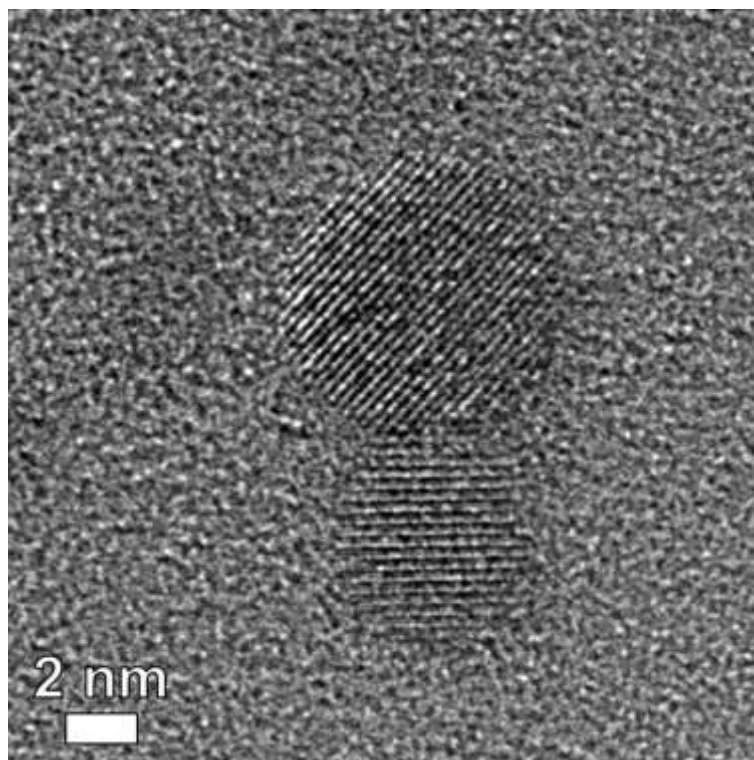

**Fig. S6** HR-TEM image showing the spherical shape of the synthesized PbS CQDs.

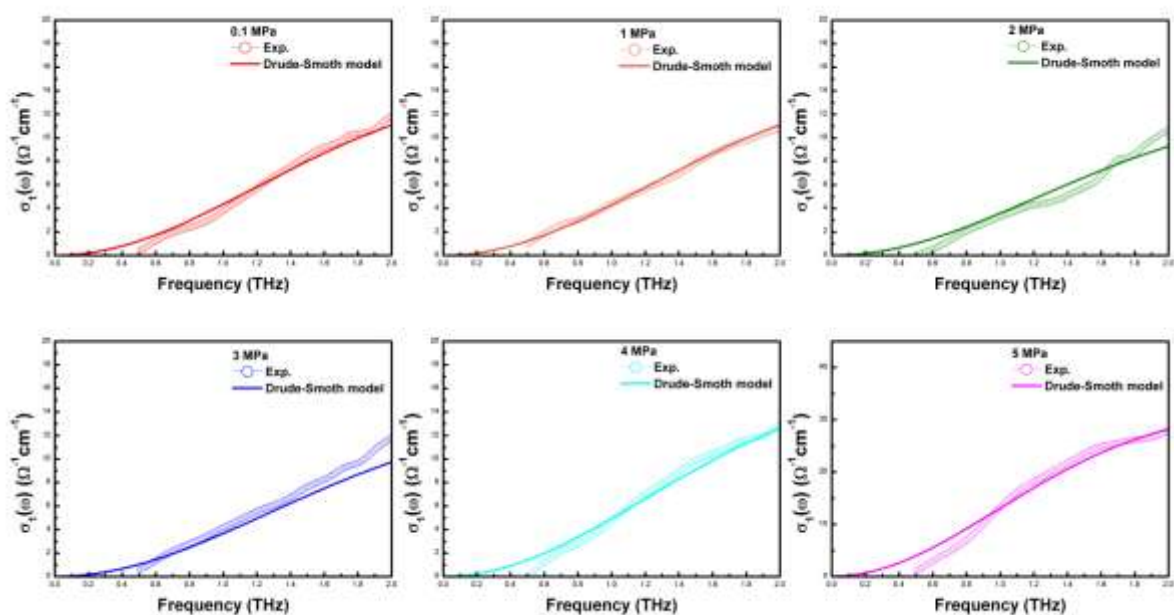

**Fig. S7a** The real part of the complex conductivity function under each pressure condition. Solid lines and open circles represent experimental and theoretical (Drude-Smith model) values, respectively.



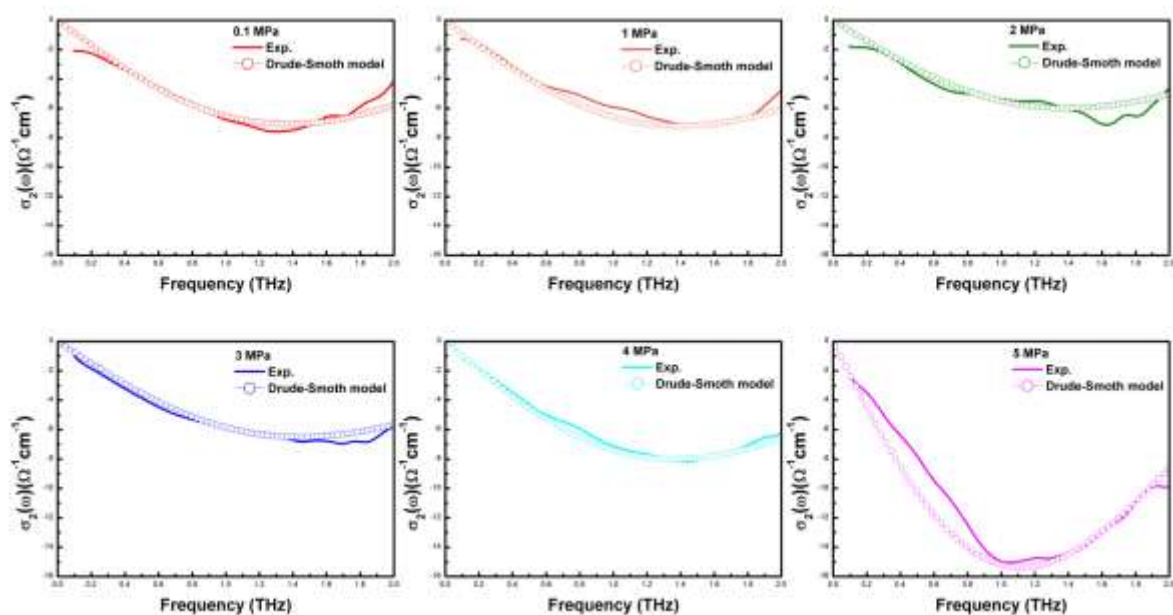

**Fig. S7b** The imaginary part of the complex conductivity function under each pressure condition. Solid lines and open circles represent experimental and theoretical (Drude-Smith model) values, respectively.
